# Supplementary material for: Feeding Selectivity and Diet Shift of Protosalanx chinensis during Spring in Lake Dalong, Northeastern China
Source: MDPI journal article supplement (doi:10.3390/w15101847), 2023-05-12
Supplement: s1 [file s1]

Archive with 1 entries (1 files):
- water-2333682-supplementary.pdf
