# Supplementary material for: Feeding Selectivity and Diet Shift of Protosalanx chinensis during Spring in Lake Dalong, Northeastern China
Source: MDPI journal article supplement (doi:10.3390/w15101847), 2023-05-12
Supplement: s1 [file s1 › water-2333682-supplementary.pdf]

Feeding Selectivity and diet shift of *Protosalanx chinensis* during spring in Lake Dalong, Northeastern China

Haoyu Zeng<sup>1,2</sup>, Fujiang Tang<sup>1, \*</sup>, Zhe Li<sup>1</sup>, Wanqiao Lu<sup>1</sup>, Yi Zheng<sup>1,2</sup> and Peilun Li<sup>1</sup>

<sup>1</sup> Heilongjiang River Fisheries Research Institute of Chinese Academy of Fishery Sciences, Harbin 150070, China; Scientific Observing and Experimental Station of Fishery Resources and Environment in Heilongjiang River Basin, Ministry of Agriculture and Rural Affairs, Harbin 150070, China; National Agricultural Experimental Station for Fishery Resources and Environment, Fuyuan, Harbin 150000, China;

<sup>2</sup> College of Fisheries and Life Science, Shanghai Ocean University, Shanghai 201306, China

Supplementary data:

Figure S1: Body length distribution of Copepoda and Cladocera in Lake Dalong during spring 2021 (mass percentage).

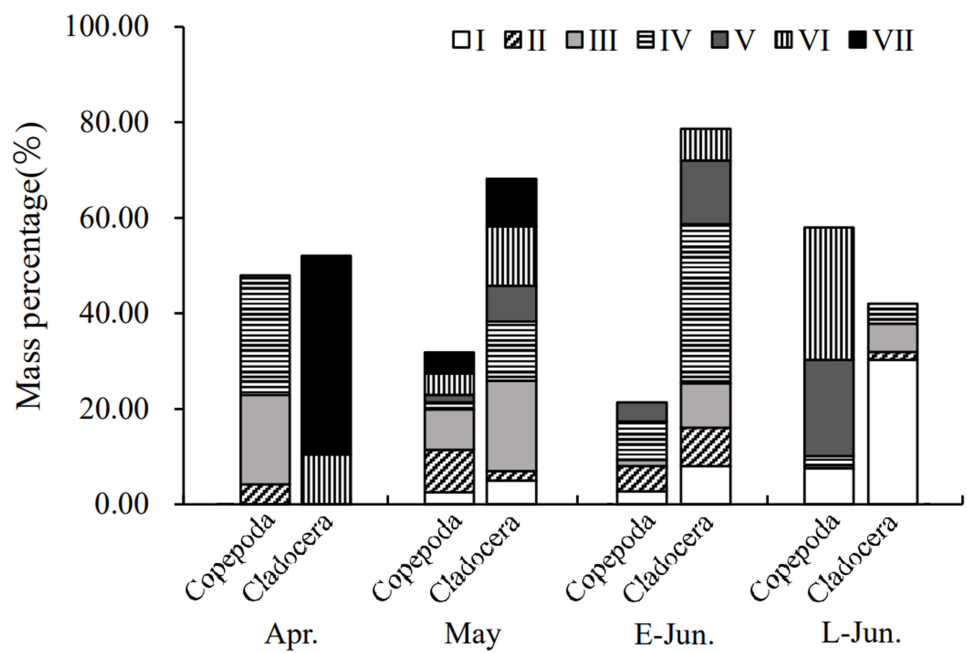

Figure S1: Body length distribution of Copepoda and Cladocera in Lake Dalong during spring 2021 (mass percentage).
